# Supplementary material
Source: PubMed Central journal article supplement (PMC3059006)
Supplement: supp_M110.194548_fig.pdf [file supp_M110.194548_fig.pdf]

**Supplemental Figure 1: Sequence alignment based on the structural superimposition of PcGSTO1 and GSTs representative of different classes found by DALI (46) to be the closest structural neighbors of PcGSTO1.**

CgGSTO : GST from *Corynebacterium glutamicum* (PDB ID 3M1G, UniProKB ref. Q8NR03, Midwest Center for Structural Genomics, unpublished results); gmGSTT : a tau class GST from *glycine max* (PDB ID 2VO4 (58), UniProKB ref. O49235); DmGSTD: a delta class GST from *Drosophila melanogaster* (PDB ID 3F6F, UniProKB ref. Q9VGA1, Wongsantichon and coworkers, unpublished results); ScGST, a GST from *Saccharomyces cerevisiae* (PDB ID 3ERF (59), UniProKB ref. Q12390); PmGSTB, a beta class GST from *Proteus mirabilis* (PDB ID 2PMT (60), UniProKB ref. P15214); hGSTO, a omega class GST from human (PDB ID 1EEM (10), UniProKB ref. P78417). The sequence alignment was generated with the programs STRAP (61) and ESPript (62). PcGSTO1 and hGSTO secondary structure elements are shown above and below the sequence alignment, respectively.

58. Axarli, I., Dhavala, P., Papageorgiou, A. C., and Labrou, N. E. (2009) *J. Mol. Biol.* **385**, 984-1002
59. Ma, X. X., Jiang, Y. L., He, Y. X., Bao, R., Chen, Y., and Zhou, C. Z. (2009) *EMBO Rep.* **10**, 1320-1326
60. Rossjohn, J., Polekhina, G., Feil, S. C., Allocati, N., Masulli, M., De Illio, C., and Parker, M. W. (1998) *Structure (Lond.)* **6**, 721-734
61. Gille, C., and Frommel, C. (2001) *Bioinformatics* **17**, 377-378
62. Gouet, P., Robert, X., and Courcelle, E. (2003) *Nucleic Acids Res.* **31**, 3320-3323

*PcGSTO1* 1 10 20 30 40 50 60 70

*PcGSTO1* ASFTTGSTLQHQEAQLQGAKDETVTQLEQRAAGGASHELQSDISKMKTEDDGSFKRKAASFRNWIQPNGD  
*CgGSTO* .....SNAMANTSSDWAGAPQNASADGEFVRDNTNYIDDRIVADVDPAGESEPIAQEDGTFH  
*gmGSTT* .....  
*DmGSTD* .....  
*ScGST* .....MNGRGFLIYNG  
*PmGSTB* .....  
*hGSTO* .....MSGESARSLGKGSAPP  
*hGSTO* TT

*PcGSTO1* β1 α1 β2

80 90 100 110 120 130 140

*PcGSTO1* FTPEKGRYHLYVSYACPWAATRLIVRKLKGLLEDFIGVTVVSPRMGSNGWPFANVDPFPAADSDPLNNAQH  
*CgGSTO* WPVEAGRVRVLAARACPWAHRTVITRRLGLLENVISLGLTGPTHVRSWTFDLDPNHLDVPLQIPRLQDA  
*gmGSTT* ...MQDEVVLLDFWPSFPFGRMVRITALAEKGI..KYEYKEEDLRN.....  
*DmGSTD* .....MDLYYRPGSAPCRSVLMTAKALGVE.FDKKTIINTRA.....REQ  
*ScGST* GEKMKQKMIYDTPAGPYPARVITALAEKNMLSSVQFVRINLWK.....GEH  
*PmGSTB* .....MKLYYTPGS.CSLSPHIVLRETSGL..DFSIERIDLRT.....KKTE  
*hGSTO* GVPPEGSIRIYSMRFCPFAERTRVLKAKGI..RHEVININLKN.....  
*hGSTO* TT β1 α1 β2 TT

*PcGSTO1* α2 β3 β4 α3

150 160 170 180 190 200

*PcGSTO1* VKDLYLKVKPDYDGRFTVPLVNDKHTGTIVNNESSEIIRMFNATFNHLLPEDKAKLDLYFESL...RAKI  
*CgGSTO* YFNRFDPYPRG...ITVPALEVESKSKVVTNDYPSITIDFNLEWKQFHREGA..PNLYPAEL...REEM  
*gmGSTT* KSPLLLQMNVPVH...KKIPVLIHN.GKPIIC..ESLIAVQYIEEVWND.....RNPLPSDPYQ..RAQT  
*DmGSTD* FTPEYLIKINPQ...HTIPTLHDH.GFALW..ESRAIMVYLVEKYGK.....DDKLFPKDVQK..QALI  
*ScGST* KKPEYFLAKNYS...GTVPVLELDDCTLIJA..ECTAITEYIDALD.....GTPTLITGKTPLE..KGI  
*PmGSTB* SGKDFLAINPK...GQVPVQLQDNGDILT..EGVAIVQYLADLKP...RNLIAPPKALERYHQ  
*hGSTO* KPEWFPKKNPF...GLVPLVENSQQLTY..ESAITCEYLDEAYPG.....KKLLEDDPYE..KACQ  
*hGSTO* α2 β3 β4 α3

*PcGSTO1* α4 α5

210 220 230 240 250 260

*PcGSTO1* DEVNDWVYDVTNNGVYK...SGFASTQ...KAYEAAVPLPFESLDRLEKMLEGQDYLI..GGLT  
*CgGSTO* APVMKRIEFTVNNNGVYR...TGFAGSQ...BAHNEAYKRLWVALDWLEDRLSTRYLM..GDHIT  
*gmGSTT* RFWADYVDKKIYDLGRK...IWTSKGE...EKEAAKKEFIEALKLLEEQLGDKT.YFG..GDNLG  
*DmGSTD* NQRLYFDMGTYLKSFPSE...YYYPQIFLKKP...ANEENYKKIEVAFEFLLNTFLEGQTYTSAG..GDNYS  
*ScGST* HMMNKRAELELLDPVSVYFHHATPPLGLPEVELYQNKWGLRQRDKALHGMHYFDTVLRERPYVA..GDSFS  
*PmGSTB* IEWLNFLASEVHKGYSP...LFSSDTPES...YLPVVKNKLKSKFVYINDVLSK.QKCVG..GDHFT  
*hGSTO* KMILELFSKVPVSLVGSFI...RSQNK...DYAGLKEEERKEFTKLEEVLTNKKTTFFG..GNSIS  
*hGSTO* α4 α5 TT

*PcGSTO1* α6 α7 α8 α9

270 280 290 300 310 320 330

*PcGSTO1* LEADIRLFVTIVRFDVYVTHFKCNLRTIRDGYPNLHRVMRKLWGNPAFKDTCNFEHIKTHYFWSHTFIN  
*CgGSTO* EADIRLYPTLVRFDVYVHGHFKCGRNKITEMPNLWGYLRDLFQT..PGFGDTDFTEIKQHYYITHAIBIN  
*gmGSTT* FVDIALVFPFYT.WFKAYETFGTLNI...ESECPKFIAWAKRCLQKE.SVAKSLPDQKQVYEFIMDLRKKLG  
*DmGSTD* LADIAFLATVS.TFDVAGDFKRY...ANVARWYENAKKLT.PGWEEWAGCQEFKRYFDN...  
*ScGST* MADITVIAGLI.FAAIVKLVQVPEEC...EALRAWYKRMQQR..PSVKKLEIRSKSS...  
*PmGSTB* VADAYLFTLSQ.WAPHVALDLTDL...SHLQDYLRARIAQR..PNVHSALVTEGLIKE...  
*hGSTO* MIDYLIWPFERLEAMKLNCEVDHT...PKLKLWMAAMKED..PTVSALLTSEKDWQGFLELYLQNS  
*hGSTO* α6 α7 α8 α9

*PcGSTO1* 340 350

*PcGSTO1* PHRIVPIGPIPDILPLDA.....  
*CgGSTO* PTRIVVPGPDLSGFATPHGREKLGSPFABGVTLPGPIPAGEEVKNPEPFQK  
*gmGSTT* IE.....  
*DmGSTD* .....  
*ScGST* .....  
*PmGSTB* .....  
*hGSTO* PEACDYGL.....  
*hGSTO* α10

**Supplemental Table 1 : Primers used in this study.**

The *Nco*I and *Bam*HI cloning restriction sites are underlined in the primers. The mutagenic codons are in bold.

| Name                  | Sequence                                       |
|-----------------------|------------------------------------------------|
| GSTO1 full length for | 5' <u>CCCCCATGGCTACCACCATCTGCCTGCGA</u> 3'     |
| GSTO1 truncated for   | 5' <u>CCCCCATGGCTAGCTTCACAACCGGCAGC</u> 3'     |
| GSTO1 rev             | 5' <u>CCCCGGATCCTCAGGCGTCGAGAGGGAG</u> 3'      |
| GSTO3 for             | 5' <u>CCCCCATGGCTCCCATCCCCGACGAG</u> 3'        |
| GSTO3 rev             | 5' <u>CCCCGGATCCCTACGGGATATCACGGCC</u> 3'      |
| GSTO1 C86S for        | 5'TACGTCTCGTACGCGTCCCCTTGGG <b>CCACCCGC</b> 3' |
| GSTO1 C86S rev        | 5'GCGGGTGGCCCAAGGGGACGCGTACGAGACGTA 3'         |
| GSTO3 C37S for        | 5'TACGCTGGCTGGTTCAGTCCGTTTGTCCAGAGG 3'         |
| GSTO3 C37S rev        | 5'CCTCTGGACAAACGGACTGAACCAGCCAGCGTA 3'         |
